# Supplementary material
Source: PubMed Central journal article supplement (PMC6550315)
Supplement: NIHMS1021529-supplement-Sup_Figs_and_Tables.pdf [file NIHMS1021529-supplement-Sup_Figs_and_Tables.pdf]

# **Interplay between the kinesin and tubulin mechanochemical cycles underlies microtubule tip tracking by the non-motile ciliary kinesin Kif7**

Shuo Jiang<sup>1,2,\*</sup>, Nandini Mani<sup>1,2,\*</sup>, Elizabeth M. Wilson-Kubalek<sup>3,\*</sup>, Pei-I Ku<sup>1,2</sup>, Ronald A. Milligan<sup>3</sup>, Radhika Subramanian<sup>1,2,±</sup>

<sup>1</sup>Department of Molecular Biology, Massachusetts General Hospital, Boston, MA 02114, USA

<sup>2</sup>Department of Genetics, Harvard Medical School, Boston, MA 02115, USA

<sup>3</sup>The Scripps Research Institute, La Jolla, CA 92037, USA

\*Equal contribution

±Corresponding Author

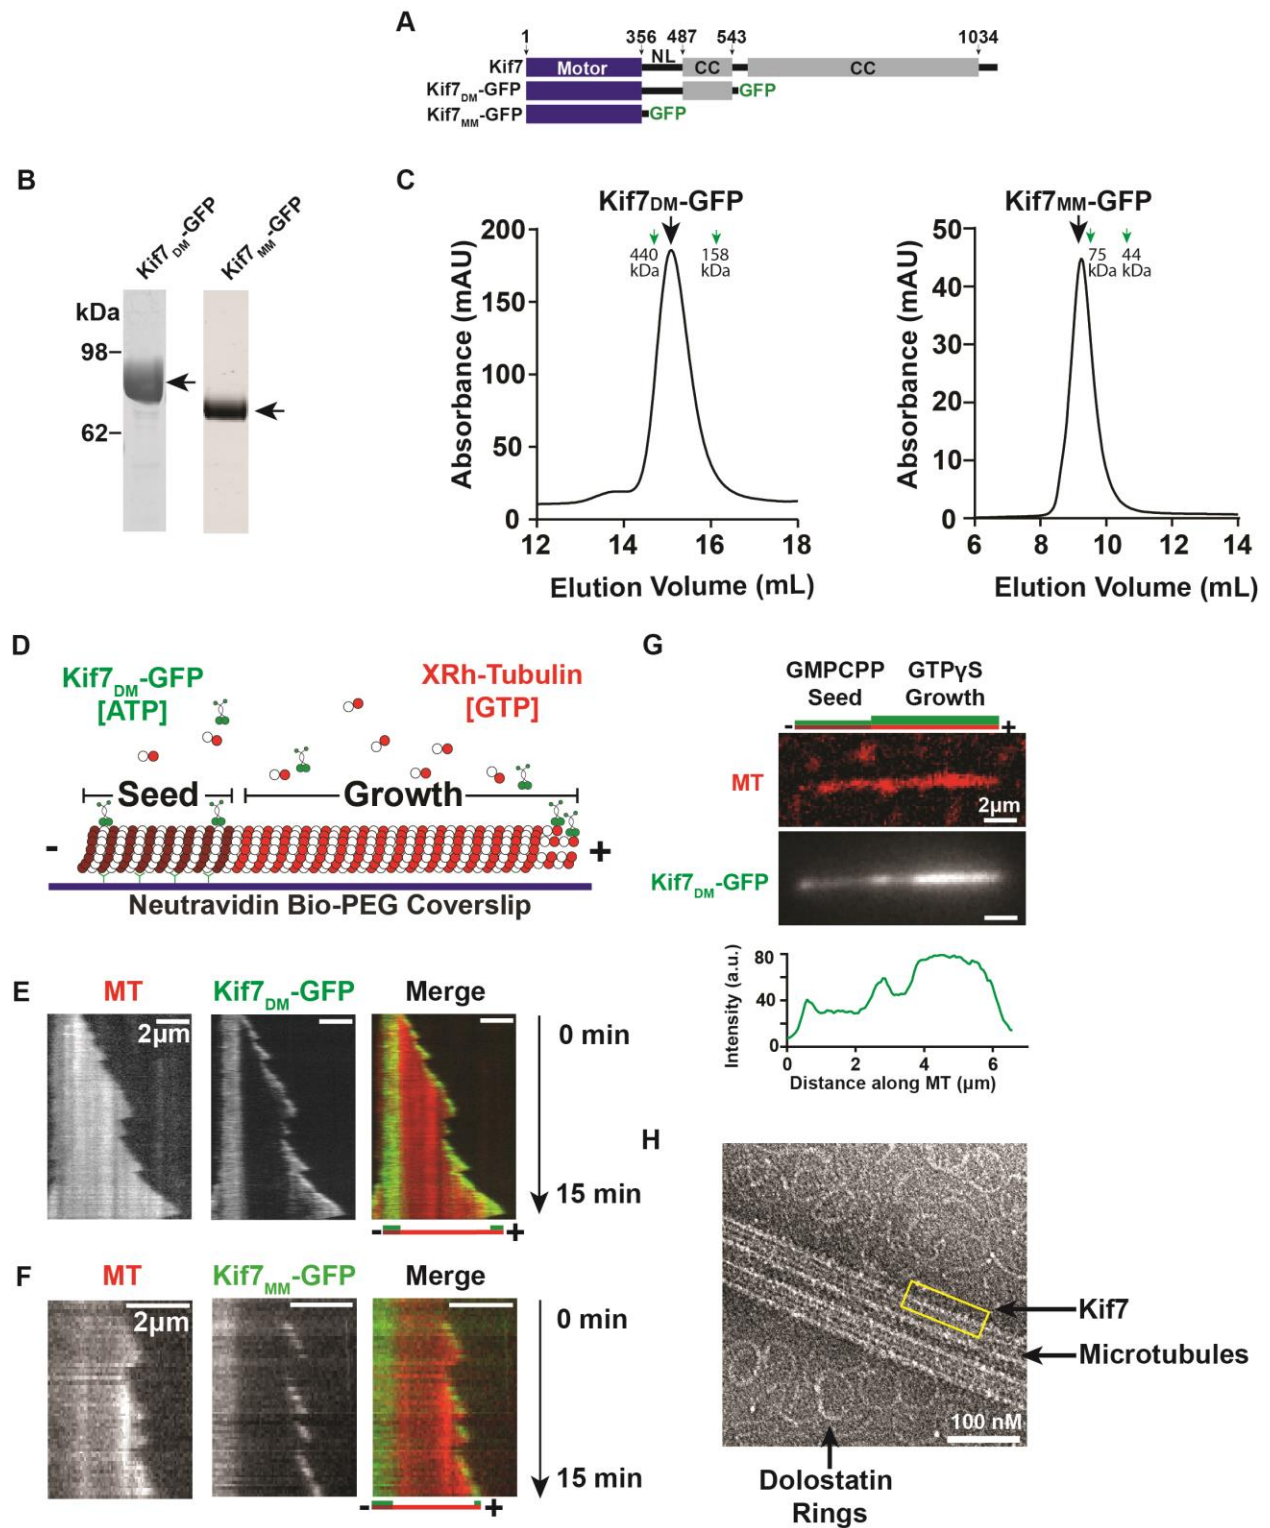

**Figure S1**

2  
3  
4

5 **Figure S1.** *Related to Figure 1*

6 **A.** Domain organization indicating the motor domain, neck-linker (NL) and coiled-coil (CC)  
7 of full length Kif7 and the constructs used for fluorescence microscopy assays.

8 **B.** SDS-PAGE analysis of purified Kif7<sub>DM</sub>-GFP (left) and Kif7<sub>MM</sub>-GFP (right). Arrows as  
9 indicators.

10 **C.** Chromatograms from size exclusion chromatography for Kif7<sub>DM</sub>-GFP (left) (Superose  
11 6 increase 10/300 GL) and Kif7<sub>MM</sub>-GFP (right) (Superdex 75 10/300 GL). Green arrows  
12 indicate elution volume of molecular weight markers.

13 **D.** Schematic of the dynamic microtubule assay used to examine Kif7<sub>DM</sub>-GFP localization  
14 on growing microtubules. X-rhodamine-labeled GMPCPP-stabilized microtubule 'seeds'  
15 (brown) were immobilized on a glass coverslip via a neutravidin-biotin linkage. Kif7  
16 localization on the dynamic microtubule was examined by incubating the seeds with X-  
17 rhodamine-labeled tubulin (red), 1 mM GTP, Kif7<sub>DM</sub>-GFP (green) and 1 mM ATP.

18 **E.** Representative kymograph of the microtubule, GFP and merged channels showing  
19 Kif7<sub>DM</sub>-GFP localization at the tip of the growing microtubule over 15 minutes. The  
20 schematic below the image indicates the position of the seed (brown), growth (red) and  
21 the associated Kif7<sub>DM</sub>-GFP signal (green).

22 **F.** Representative kymographs of the microtubule, GFP and merged channels showing  
23 Kif7<sub>MM</sub>-GFP localization at the tip of the growing microtubule over 15 minutes. The  
24 schematic below the image indicates the position of the seed (brown), growth (red) and  
25 the associated Kif7<sub>MM</sub>-GFP signal (green).

26 **G.** Representative image of microtubule (top) and associated Kif7<sub>DM</sub>-GFP (middle) and  
27 line scan of Kif7<sub>DM</sub>-GFP intensity (bottom) obtained from the experiment described in

28 “Figure 1A’. Assay conditions: 150 nM Kif7<sub>DM</sub>-GFP and 1 mM ATP and 1 mM GTPγS.  
29 Microtubule grown only from X-rhodamine labeled tubulin for control. The schematic  
30 above the image indicates the position of the seed (brown), GTPγS growth (red) and the  
31 associated Kif7<sub>DM</sub>-GFP signal (green).  
32 **H.** Electron micrographs of negatively stained Kif7<sub>DM</sub>-GFP binding to straight microtubule  
33 and dolostatin induced microtubule rings.

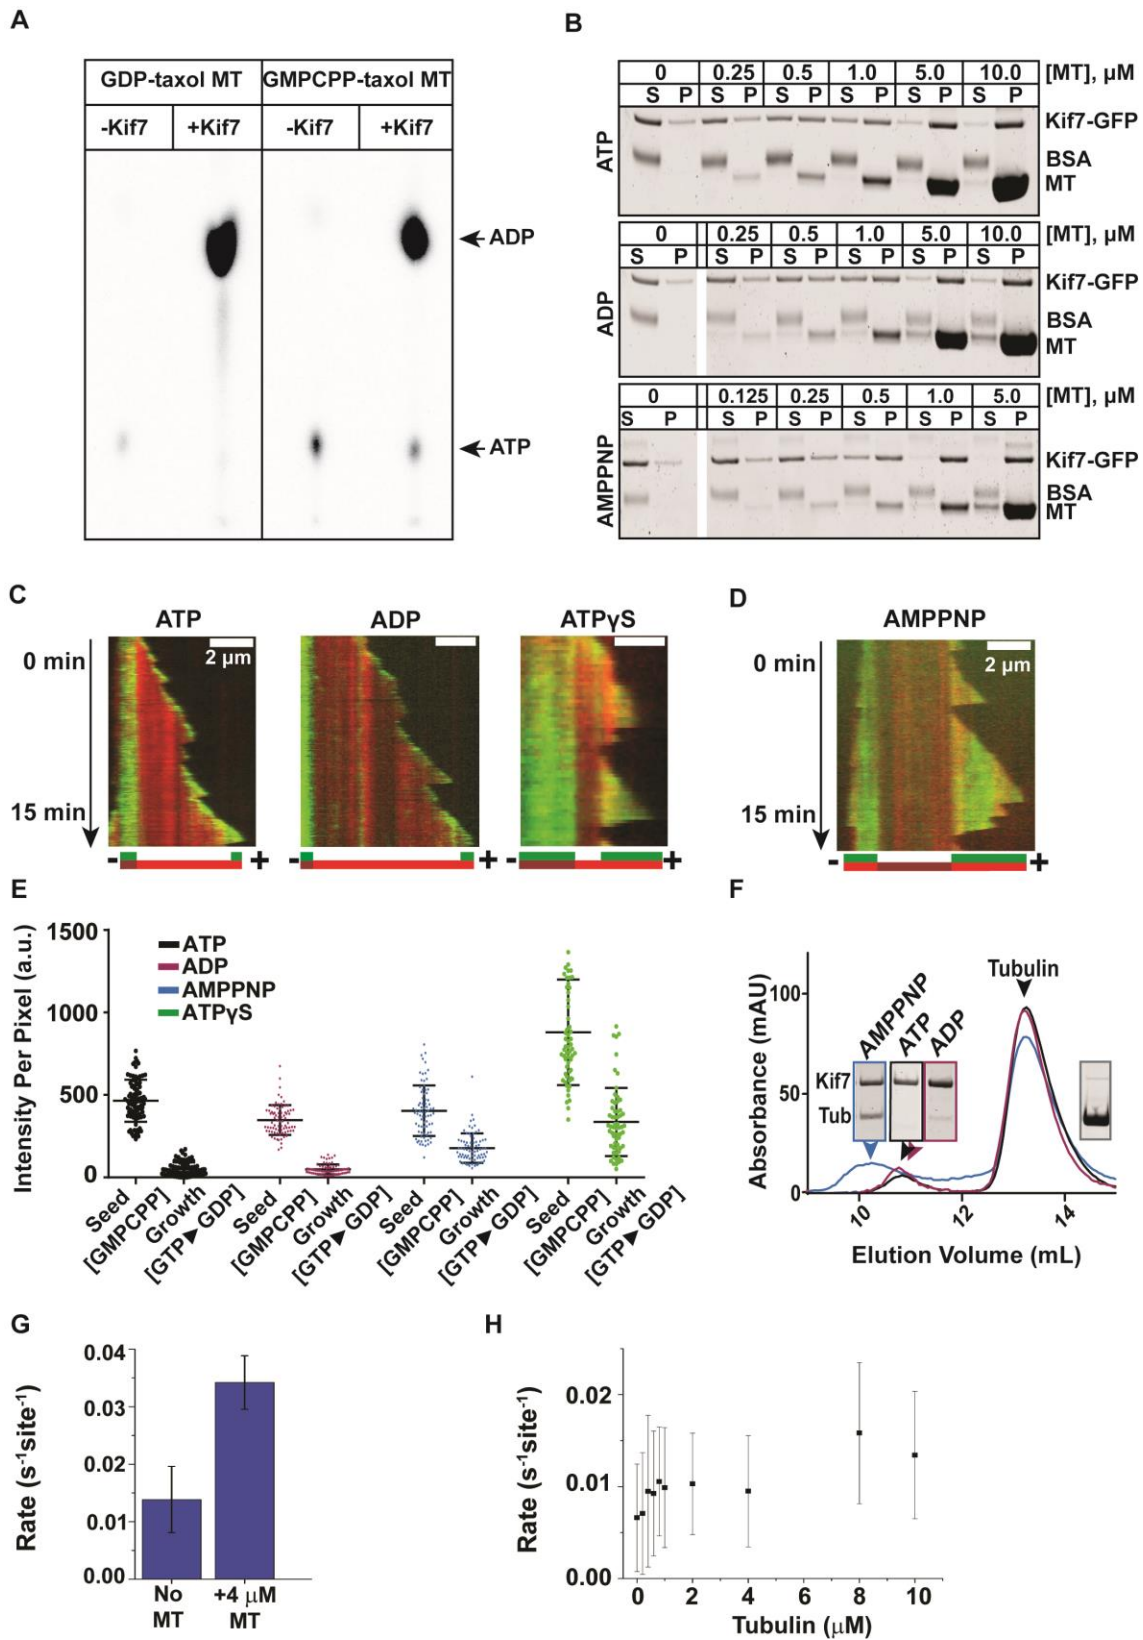

Figure S2

34

35

36 **Figure S2.** *Related to Figure 2*

37 **A.** TLC analysis of the adenosine nucleotide content of Kif7 bound to GMPCPP and GTP  
38 polymerized taxol stabilized microtubules. >95% of Kif7 associated is in the ADP form.

39 **B.** SDS-PAGE analysis of Kif7<sub>DM</sub>-GFP cosedimentation on GDP-taxol stabilized  
40 microtubules (0 – 10  $\mu$ M) in the presence of 1 mM ATP, ADP and AMPPNP. (S:  
41 Supernatant, unbound fraction. P: Pellet, bound fraction. BSA: Bovine Serum Albumin,  
42 gel loading control).

43 **C.** Representative kymographs of Kif7<sub>DM</sub>-GFP localization at the tip of the growing  
44 microtubule in the presence of 1 mM ATP, ADP and ATP $\gamma$ S. The schematic under the  
45 image indicates the position of the seed (brown), growth (red) and the associated Kif7<sub>DM</sub>-  
46 GFP signal (green).

47 **D.** Representative merged kymograph showing Kif7<sub>DM</sub>-GFP localization on the growing  
48 microtubule in the presence of AMPPNP. The schematic under the image indicates the  
49 position of the seed (brown), growth (red) and the associated Kif7<sub>DM</sub>-GFP signal (green).

50 **E.** Scatter plot of GFP fluorescence intensity per pixel of Kif7<sub>DM</sub>-GFP on the GMPCPP-  
51 seed and GTP $\blacktriangleright$ GDP growth regions in the presence of different adenosine nucleotides.  
52 Error bars represent standard deviation. Assays were performed under Kif7<sub>DM</sub>-GFP  
53 concentrations that resulted in similar average fluorescence intensities on the GMPCPP-  
54 seeds in the presence of different nucleotides to allow for normalization. Assay conditions:  
55 150 nM Kif7<sub>DM</sub>-GFP and 1 mM ATP; 250 nM Kif7<sub>DM</sub>-GFP and 1 mM ADP; 10 nM Kif7<sub>DM</sub>-  
56 GFP and 1 mM AMPPNP; 50 nM Kif7<sub>DM</sub>-GFP and 1 mM ATP $\gamma$ S. (GMPCPP-seed: ATP:  
57  $464.7 \pm 127.8$ ; N = 81, ADP:  $347.2 \pm 90.7$ ; N = 78, AMPPNP:  $403.6 \pm 153.1$ ; N = 78 and

58 ATP $\gamma$ S:  $879.2 \pm 320$ ; N = 61. GDP growth: ATP:  $49.9 \pm 41.3$ ; N = 81, ADP:  $48.0 \pm 30.3$ ;  
59 N = 78, AMPPNP:  $177.4 \pm 89.1$ ; N = 78 and ATP $\gamma$ S:  $335.9 \pm 206.0$ ; N = 61).

60 **F.** Size exclusion chromatography (Superdex 200 increase 10/300 GL) and SDS-PAGE  
61 analysis (Inset, ATP: black, ADP: purple and AMPPNP: blue) to examine the interaction  
62 of Kif7<sub>DM</sub>-GFP (1  $\mu$ M) with free-tubulin dimer (20  $\mu$ M) in the presence of 1 mM ATP, ADP  
63 and AMPPNP.

64 **G.** ATPase assay showing 3-fold enhancement of Kif7 intrinsic ATPase rate in the  
65 presence of microtubules. (No microtubule:  $0.014 \pm 0.006 \text{ s}^{-1}\text{site}^{-1}$  and +4  $\mu$ M Microtubule:  
66  $0.03 \pm 0.005 \text{ s}^{-1}\text{site}^{-1}$ ).

67 **H.** ATPase assay showing no simulation of the basal ATPase rate of Kif7 by soluble  
68 tubulin.

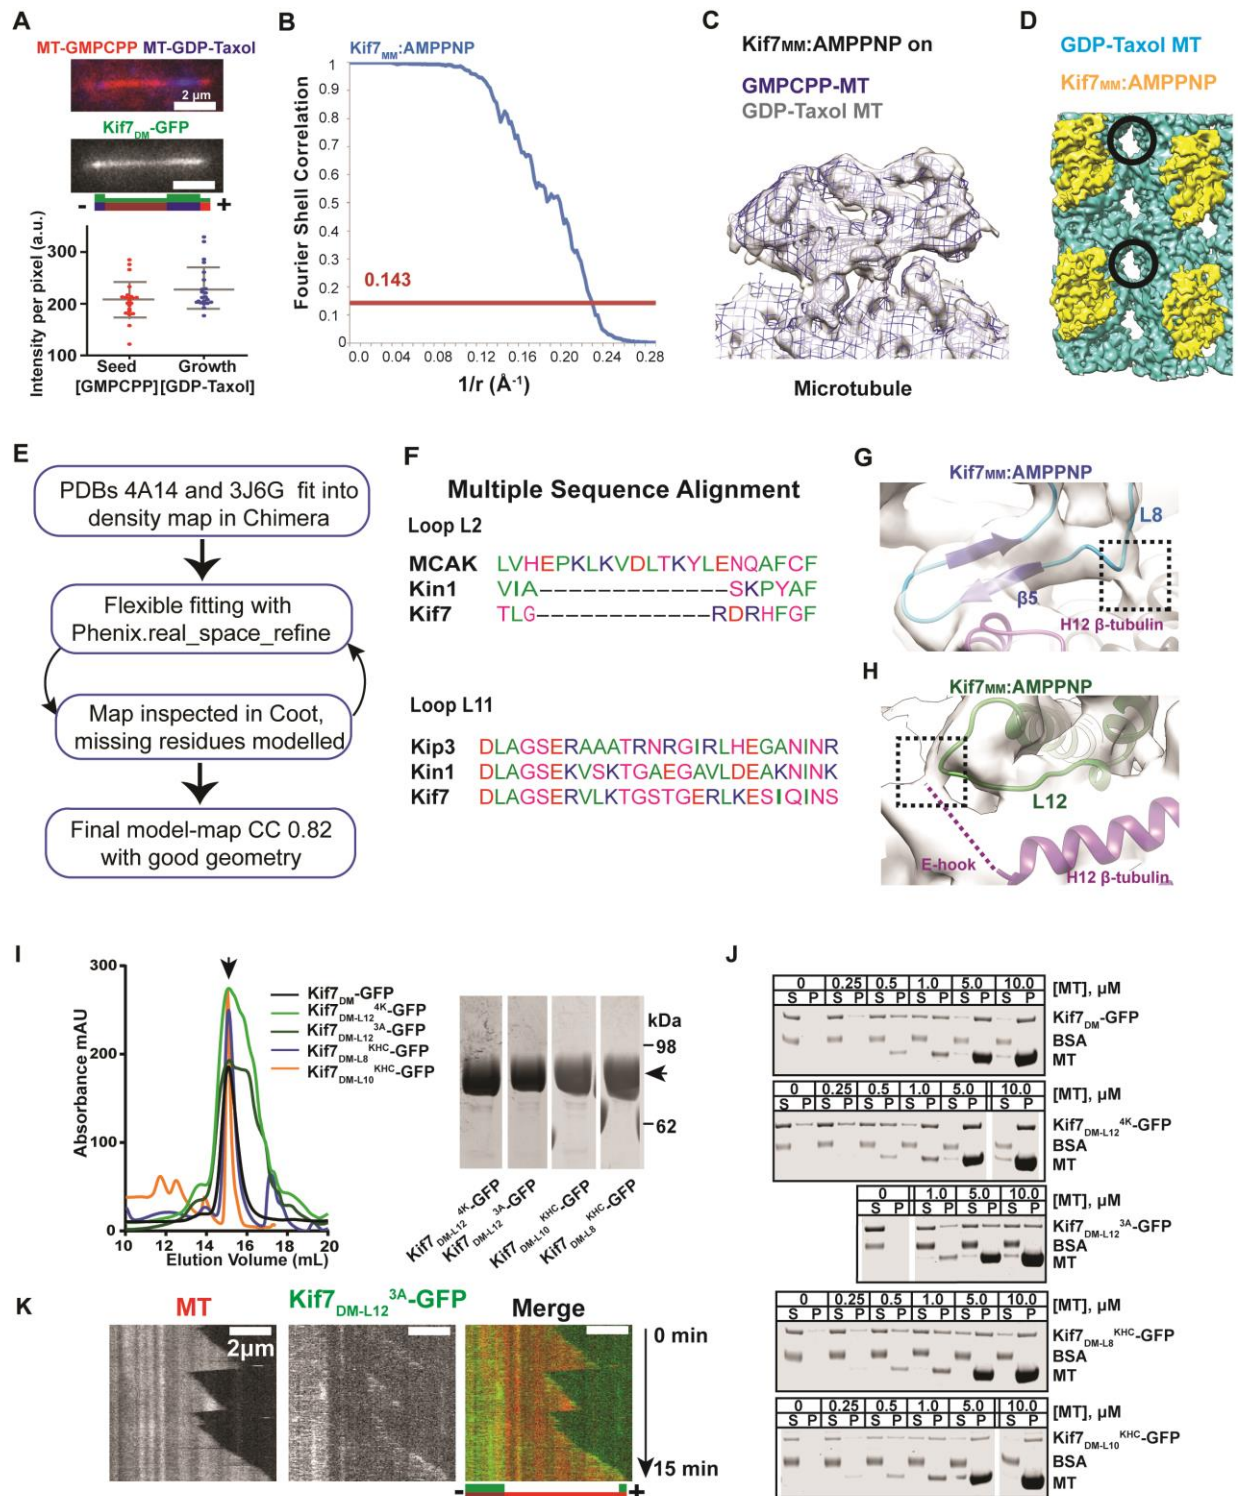

Figure S3

69

70

71



72 **Figure S3.** *Related to Figure 3*

73 **A.** Representative fluorescence image (top) and intensity analysis (bottom) of Kif7<sub>DM</sub>-GFP  
74 associated on segmented microtubules containing a GDP-taxol stabilized growth region  
75 (blue). Assay conditions: 150 nM Kif7<sub>DM</sub>-GFP and 1 mM ATP and 1 mM GDP-taxol. The  
76 schematic below the fluorescence image indicates the position of the seed (brown),  
77 growth (blue), cap (red) and the associated Kif7<sub>DM</sub>-GFP signal (green). (GMPCPP-seed:  
78  $206.9 \pm 36.4$ ; N = 21. GDP-Taxol growth:  $229.3 \pm 41.1$ ; N=21).

79 **B.** FSC curve for Kif7<sub>MM</sub>:AMPPNP on GDP-taxol microtubules.

80 **C.** Superposition of cryo-EM reconstructions of Kif7<sub>MM</sub>:AMPPNP bound to GDP-Taxol  
81 stabilized microtubules (gray solid) and GMPCPP-microtubules (blue mesh)

82 **D.** Electron density of Kif7<sub>MM</sub> (yellow) in complex with AMPPNP, bound on the GDP-taxol  
83 microtubule lattice (blue). Circle shows the canonical EB1 binding site in the inter-  
84 protofilament region.

85 **E.** Schematic of the procedure for model building and fitting into the EM reconstruction.  
86 The initial models used were PDB 4A14: crystal structure of the Kif7 motor domain and  
87 PDB 3J6G: EM-derived structure of  $\alpha$ - and  $\beta$ -tubulin from GDP-taxol stabilized  
88 microtubule.

89 **F.** Multiple sequence alignment of Loops L2 and L11 in Kif7 with other kinesins. The  
90 structure-based sequence alignment of L2 between MCAK, Kinesin-1 and Kif7 (PDB IDs:  
91 4UBF, 1BG2 and 4A14, respectively), and the sequence alignment of L11 between Kip3,  
92 Kinesin-1 and Kif7 (Uniprot IDs: P53086, P33176, Q2M1P5) are shown.

93 **G. & H.** Enlarged view of structural elements of Kif7<sub>MM</sub>:AMPPNP with insertions in  
94 sequence compared to Kin1:ATP. Helix H12 and E-hook (dotted line) of  $\beta$ -tubulin are

95 shown in purple. The black boxes highlight the insertions in **(F)** Loop L8-strand  $\beta$ 5 (blue)  
96 of Kif7<sub>MM</sub>:AMPPNP **(G)** Helix  $\alpha$ 4 and loop L12 (green) of Kif7<sub>MM</sub>:AMPPNP.

97 **I.** Purification of all Kif7<sub>DM</sub>-GFP mutant constructs used in the microtubule co-  
98 sedimentation assays. Size exclusion chromatograms (left) of constructs: Kif7<sub>DM</sub>-GFP  
99 (black), Kif7<sub>DM-L12</sub><sup>4K</sup>-GFP (light green), Kif7<sub>DM-L12</sub><sup>3A</sup>-GFP (dark green), Kif7<sub>DM-L8</sub><sup>KHC</sup>-GFP  
100 (blue) and Kif7<sub>DM-L10</sub><sup>KHC</sup>-GFP (orange) through a Superose 6 increase 10/300 GL column.  
101 Arrow indicates Kif7 elution peak. SDS-PAGE of purified proteins is shown on the right.

102 **J.** SDS-PAGE analysis of cosedimentation experiments of Kif7<sub>DM</sub>-GFP mutants on GDP-  
103 taxol stabilized microtubules in the presence of 1 mM ATP. (S: Supernatant, unbound  
104 fraction. P: Pellet, bound fraction. BSA: Bovine Serum Albumin, gel loading control).

105 **K.** Representative kymograph of the microtubule, GFP and merged channels showing  
106 Kif7<sub>DM-L12</sub><sup>3A</sup>-GFP localization at the tip of the growing microtubule in the presence of ATP.  
107 The schematic under the image indicates the position of the seed (brown), growth (red)  
108 and the associated Kif7<sub>DM-L12</sub><sup>3A</sup>-GFP signal (green).

109  
110

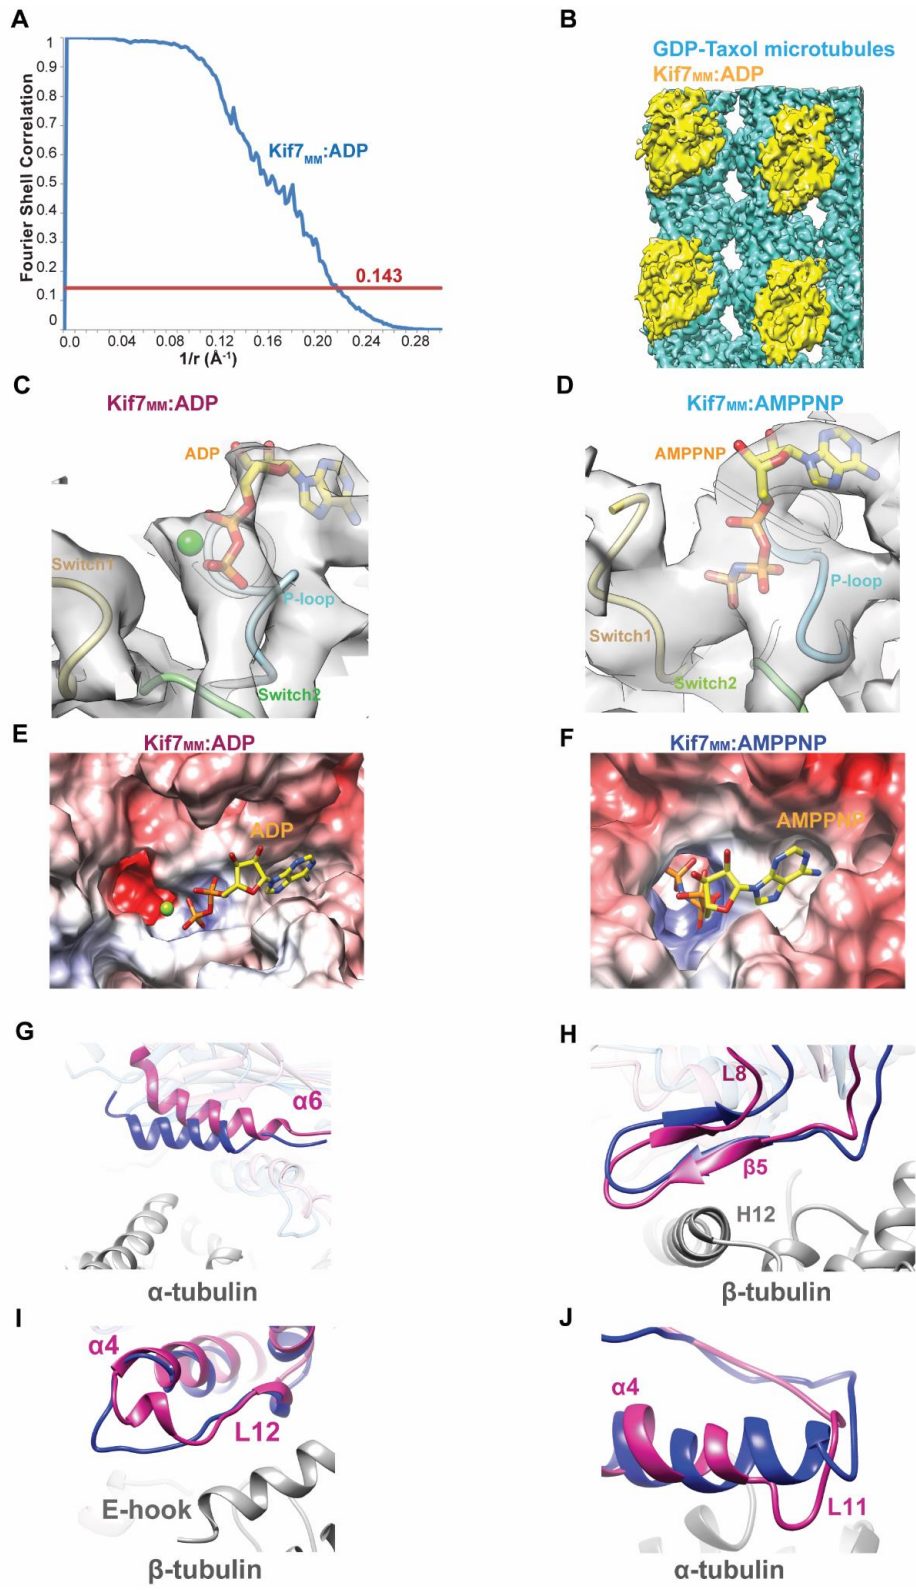

111

112

113

Figure S4

114 **Figure S4.** *Related to Figure 4*

115 **A.** FSC curve for Kif7<sub>MM</sub>:ADP on GDP-taxol microtubules.

116 **B.** Electron density of Kif7<sub>MM</sub> (yellow) in complex with ADP, bound on the GDP-taxol  
117 microtubule lattice (blue).

118 **C&D.** Enlarged view of the NBP for **(C)** Kif7<sub>MM</sub>:ADP and **(D)** Kif7<sub>MM</sub>:AMPPNP. Nucleotides  
119 are rendered as yellow sticks. Structural elements flanking the NBP are Switch1 (khaki),  
120 Switch2 (green) and P-loop (light blue).

121 **E&F.** Electrostatic surface representation of the NBP in **(E)** Kif7<sub>MM</sub>:ADP and **(F)**  
122 Kif7<sub>MM</sub>:AMPPNP. Nucleotides are rendered as yellow sticks. Surface potential ranges  
123 from -7 (red) to +7 (blue) KT/e.

124 **G-J.** Enlarged views showing the superposition between the different secondary structure  
125 elements in Kif7<sub>MM</sub>:AMPPNP (blue) and Kif7<sub>MM</sub>:ADP (pink). **(G)** Helix  $\alpha_6$ , **(H)** Loop L8 and  
126 strand  $\beta_5$ . **(I)** Helix  $\alpha_4$  and loop L12. **(J)** Helix  $\alpha_4$  and loop L11 of Kif7.  $\alpha$ - and  $\beta$ -tubulin  
127 are shown as gray ribbons.

128

129

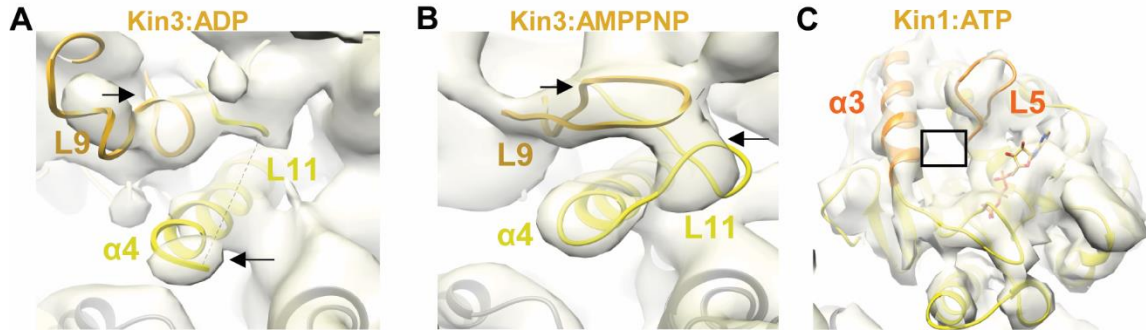

130

131

132

**Figure S5**

133 **Figure S5.** *Related to Figure 5*

134 **A&B.** Enlarged views of the pincer-like movement of loops L9 and L11 during the ADP to  
135 AMPPNP transition in Kinesin-3 (Kin3). **(A)** Kin3:ADP (PDB:4UXS, EMD: 2768), **(B)**  
136 Kin3:AMPPNP (PDB:4UXP, EMD: 2766). Arrows highlight the movement of loops L9 and  
137 L11.

138 **C.** Enlarged view of the  $\alpha$ 3 and L5 region in Kin1:ATP (PDB:3J8Y, EMD: 6188). Black  
139 box highlights the absence of density connecting  $\alpha$ 3 and L5.

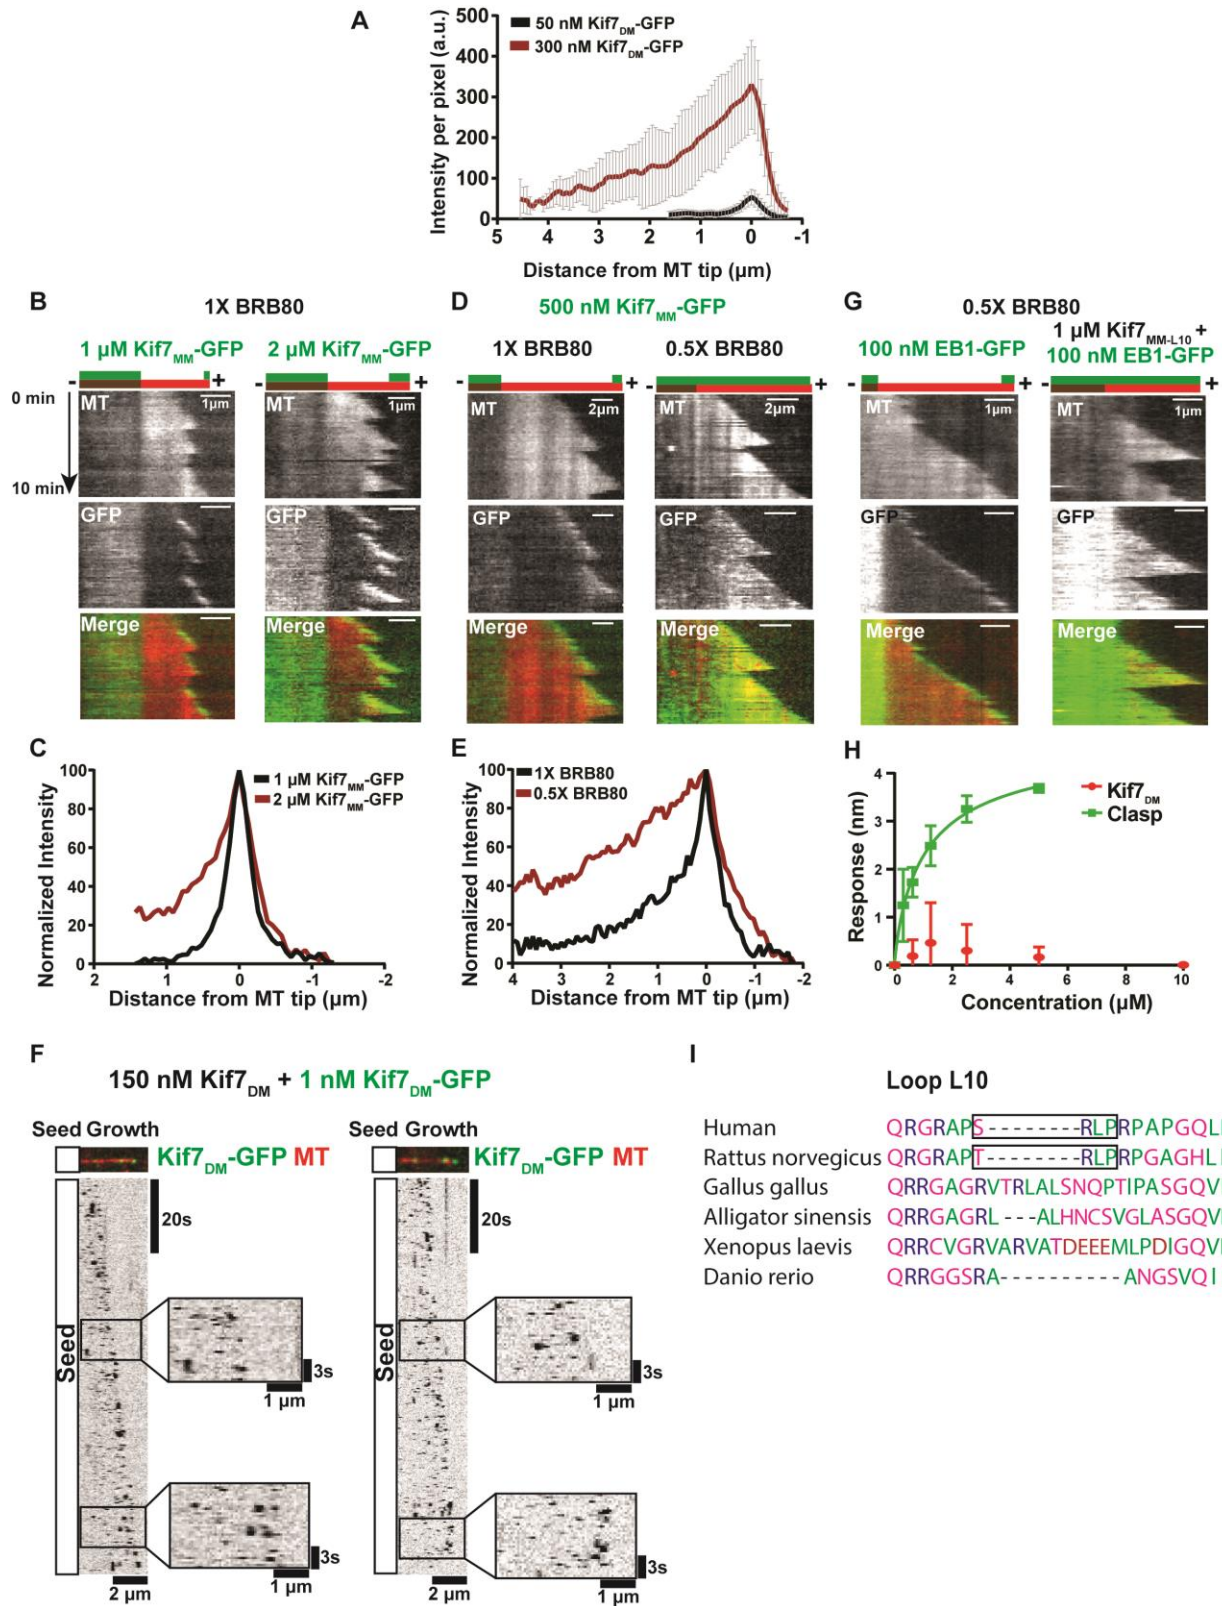

Figure S6

140

141

142

143 **Figure S6.** *Related to Figure 6*

144 **A.** Averaged GFP fluorescence intensity profile of Kif7<sub>DM</sub>-GFP along the growing  
145 microtubule-ends at 50 nM (black; N=25) and 300 nM (brown, N=25). Error bars represent  
146 standard deviation.

147 **B.** Representative kymograph of the microtubule, GFP and merged channels showing  
148 Kif7<sub>MM</sub>-GFP localization on the growing microtubule at 1  $\mu$ M and 2  $\mu$ M concentrations.  
149 The schematic above the image indicates the position of the seed (brown), growth (red)  
150 and the associated Kif7<sub>MM</sub>-GFP signal (green).

151 **C.** Normalized GFP fluorescence intensity profile of Kif7<sub>MM</sub>-GFP along the growing  
152 microtubule-ends at 1  $\mu$ M (black; N=20) and 2  $\mu$ M (brown, N=20) concentrations.

153 **D.** Representative kymograph of the microtubule, GFP and merged channels showing  
154 500 nM Kif7<sub>MM</sub>-GFP localization on the growing microtubule at 1X BRB80 and 0.5X  
155 BRB80. The schematic above the image indicates the position of the seed (brown),  
156 growth (red) and the associated Kif7<sub>MM</sub>-GFP signal (green).

157 **E.** Normalized GFP fluorescence intensity profile of 500 nM Kif7<sub>MM</sub>-GFP along the  
158 growing microtubule-ends at 1X BRB80 (black; N=20) and 0.5X BRB80 (brown, N=20).

159 **F.** Snapshot of spiked single-molecule tracking experiment during Kif7 expansion on the  
160 growing microtubule lattice. 1 nM Kif7<sub>DM</sub>-GFP (green) and 150 nM Kif7<sub>DM</sub> on growing X-  
161 rhodamine labeled microtubules (red) at 150 nM concentrations where expansion is  
162 visible (top). Representative kymograph generated from the microtubule in **(E)** showing  
163 the localization of Kif7<sub>DM</sub>-GFP at microtubule-ends (bottom). Inset shows enlarged  
164 regions of the single-molecule tracking.

165 **G.** Representative kymograph of the microtubule, GFP and merged channels showing  
166 100 nM EB1-GFP localization on the growing microtubule alone and in the presence of 1



167  $\mu\text{M}$  Kif7<sub>MM-L10</sub>. The schematic above the image indicates the position of the seed (brown),  
168 growth (red) and the associated Kif7<sub>MM</sub>-GFP signal (green).

169 **H.** Biolayer interferometry assay to quantitatively examine the binding affinity of Kif7<sub>DM</sub>  
170 (red; 0-10  $\mu\text{M}$ ) and Clasp (green; 0-5  $\mu\text{M}$ ) to EB1. Error bars represent standard deviation.  
171 The plots of BLI response of Kif7<sub>DM</sub> and Clasp bound versus concentration were fit to a  
172 Hill equation to determine the equilibrium dissociation constants at different  
173 concentrations. ( $K_d$  for Kif7<sub>DM</sub>: No Binding and Clasp:  $1.1 \pm 0.3 \mu\text{M}$ ).

174 **I.** Multiple sequence alignment of loop L10 of vertebrate Kif7 homologues from human,  
175 rat (*Rattus norvegicus*), domestic chicken (*Gallus gallus*), Chinese alligator (*Alligator*  
176 *sinensis*), *Xenopus laevis* and zebrafish (*Danio Rerio*) [Uniprot IDs: Q2M1P5, D4A9P0,  
177 F1P446, A0A1U7SD20, A0A1L8H0X0 and Q58G59, respectively]. [S/T]x[I/L]P motifs are  
178 highlighted by a black box.

179

180

181

**Table S1-Related to Figures 3 and 4**

182

**Data collection and reconstruction**

183

|                                                            | <b>Kif7<sub>MM</sub>:AMPPNP</b><br><b>(15 protofilaments)</b> | <b>Kif7<sub>MM</sub>:AMPPNP</b><br><b>(14 protofilaments)</b> | <b>Kif7<sub>MM</sub>:ADP</b><br><b>(15 protofilaments)</b> | <b>Kif7<sub>MM</sub>:ADP</b><br><b>(13 protofilaments)</b> |
|------------------------------------------------------------|---------------------------------------------------------------|---------------------------------------------------------------|------------------------------------------------------------|------------------------------------------------------------|
| <b>Data collection</b>                                     |                                                               |                                                               |                                                            |                                                            |
| Microscope                                                 | Titan Krios (FEI)                                             | Titan Krios (FEI)                                             | Titan Krios (FEI)                                          | Titan Krios (FEI)                                          |
| Voltage (kV)                                               | 300                                                           | 300                                                           | 300                                                        | 300                                                        |
| Nominal magnification*                                     | 22,500X                                                       | 22,500X                                                       | 22,500X                                                    | 22,500X                                                    |
| Cumulative exposure dose (e <sup>-</sup> Å <sup>-2</sup> ) | 37                                                            | 37                                                            | 44                                                         | 44                                                         |
| Exposure rate (e <sup>-</sup> /pixel/sec)                  | 4.7                                                           | 4.7                                                           | 4.7                                                        | 4.7                                                        |
| Detector                                                   | K2 Summit                                                     | K2 Summit                                                     | K2 Summit                                                  | K2 Summit                                                  |
| Pixel size (Å)*                                            | 1.31                                                          | 1.31                                                          | 1.31                                                       | 1.31                                                       |
| Defocus range (µm)                                         | 0.7-4.24                                                      | 0.7-4.24                                                      | 0.86-2.91                                                  | 0.86-2.91                                                  |
| Average defocus (µm)                                       | 2.31                                                          | 2.31                                                          | 1.6                                                        | 1.6                                                        |
| Micrographs Used                                           | 428                                                           | 428                                                           | 697                                                        | 697                                                        |
| Total extracted helical segment (no.)                      | 79,125                                                        | 79,125                                                        | 50,409                                                     | 50,409                                                     |
| Refined helical segment (no.)                              | 25,402                                                        | 44,295                                                        | 15,919                                                     | 19,035                                                     |
| <b>Reconstruction</b>                                      |                                                               |                                                               |                                                            |                                                            |
| Final helical segments (no.)                               | 25,402                                                        | 37,220                                                        | 15,919                                                     | 13,488                                                     |
| Symmetry imposed                                           | HP                                                            | HP                                                            | HP                                                         | HP                                                         |
| Resolution (global) FSC 0.143                              | 4.2                                                           | 4.3                                                           | 4.2                                                        | 6.5                                                        |

184

185

186

**Table S2-Related to Figures 3 and 4**

187

**Atomic model refinement statistics**

|                                              | <b>Kif7<sub>MM</sub>:AMPPNP</b> | <b>Kif7<sub>MM</sub>:ADP</b> |
|----------------------------------------------|---------------------------------|------------------------------|
| Refinement protocol                          | Phenix                          | Phenix                       |
| Resolution for refinement                    | 4.3                             | 4.2                          |
| RMS bonds (Å)                                | 0.011                           | 0.006                        |
| RMS angles (°)                               | 1.37                            | 1.30                         |
| All-atoms clashscore                         | 19                              | 14                           |
| Rotamer outliers (%)                         | 3                               | 2                            |
| Ramachandran allowed (%)                     | 12                              | 10                           |
| Ramachandran favored (%)                     | 88                              | 90                           |
| Ramachandran outliers (%)                    | 0                               | 0                            |
| Model-map real-space correlation coefficient | 0.81                            | 0.83                         |

188

189
